# Supplementary material
Source: PubMed Central journal article supplement (PMC9179170)
Supplement: NIHMS1810188-supplement-Supplemental_Figures.pdf [file NIHMS1810188-supplement-Supplemental_Figures.pdf]

Supplementary Fig. 1

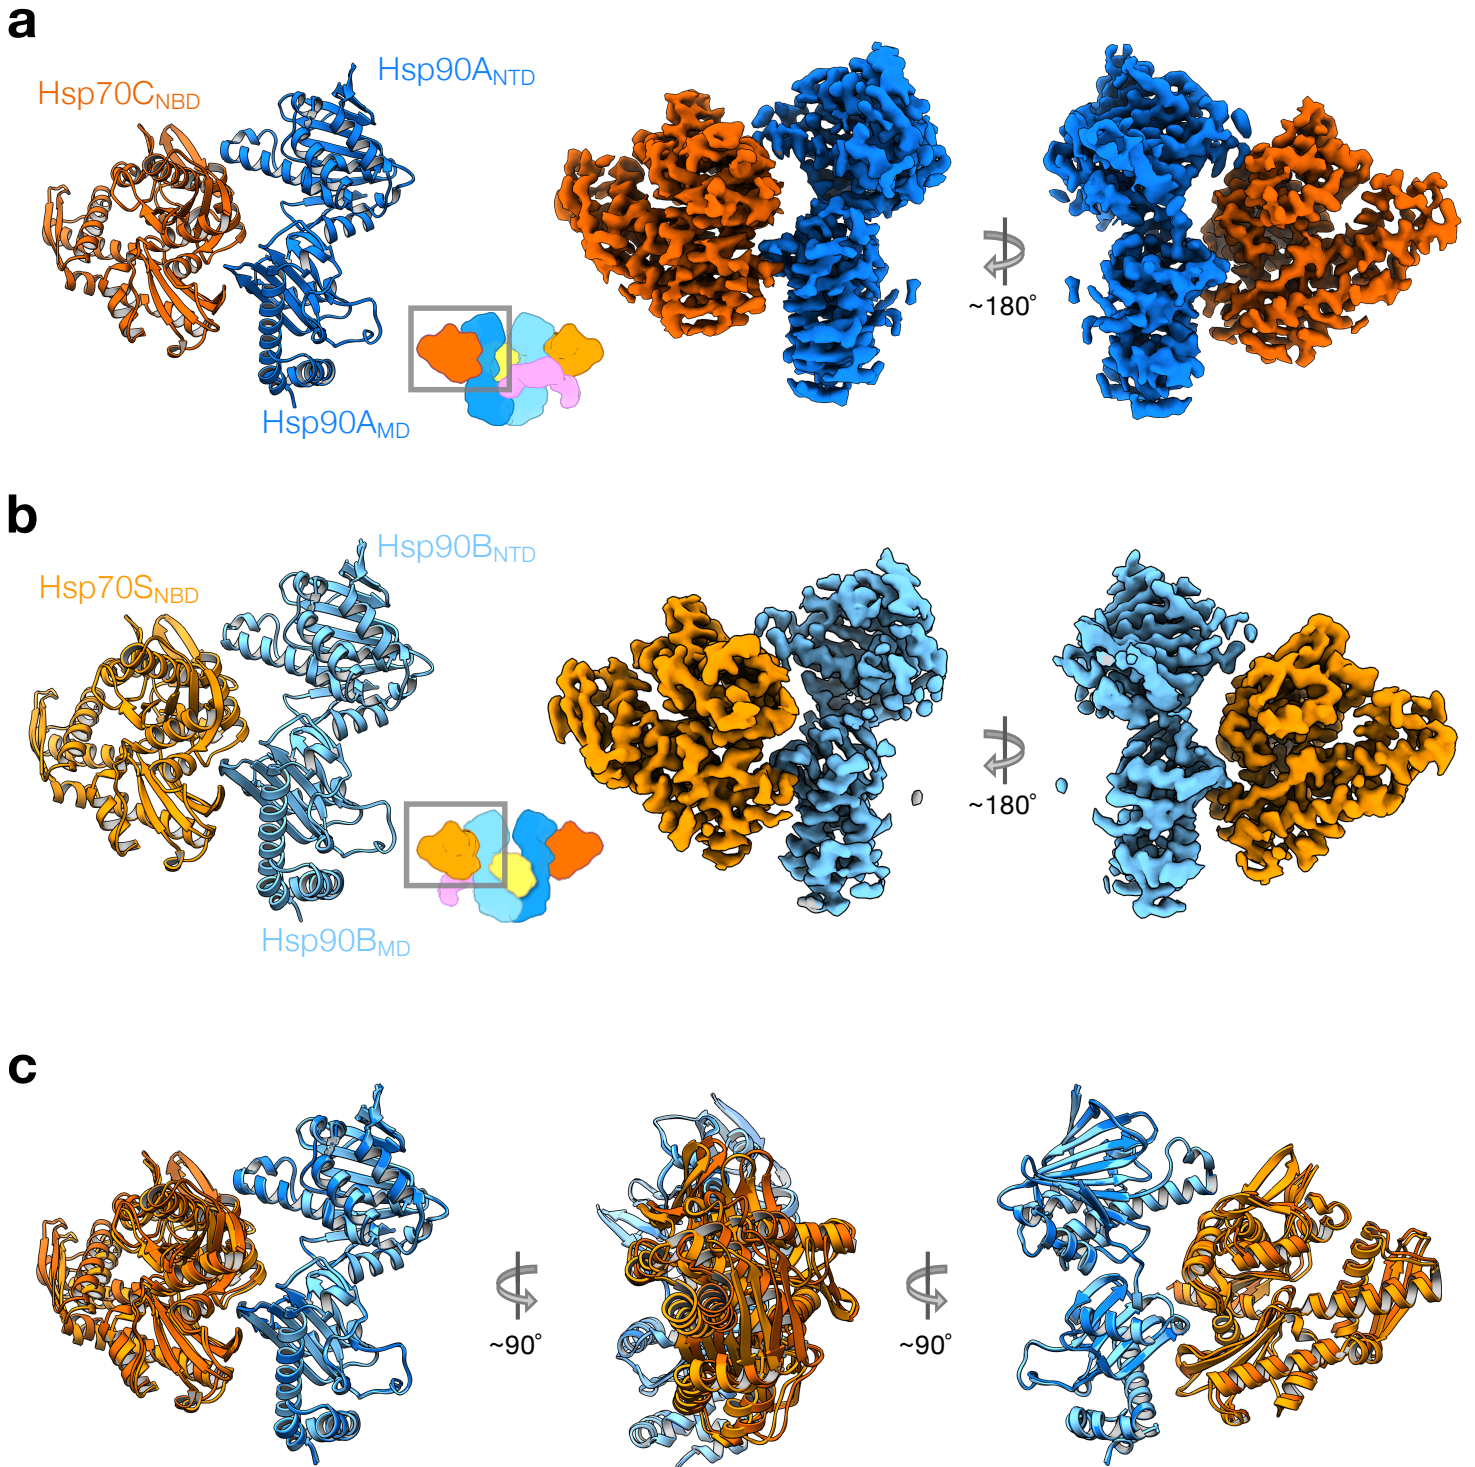



# Supplementary Fig. 2

**b**

|                |     |                                                                                                                                        |      |      |      |      |      |      |      |  |
|----------------|-----|----------------------------------------------------------------------------------------------------------------------------------------|------|------|------|------|------|------|------|--|
|                |     | -51                                                                                                                                    | -41  | -31  | -21  | -11  | -1   | 10D  | 20V  |  |
| Hsp70/1-641    | 1   | -----MAKAAAIGIDLGGTTCVGVFQHGK                                                                                                          |      |      |      |      |      |      | 25   |  |
| Hsc70/1-646    | 1   | -----MSKGPVAVGIDLGGTTCVGVFQHGK                                                                                                         |      |      |      |      |      |      | 25   |  |
| SSA1/1-642     | 1   | -----MSKAVGIDLGGTTCVVAHFANDR                                                                                                           |      |      |      |      |      |      | 23   |  |
| BIP/1-654      | 1   | -----MKLSLVAAMLLLSAARAEEEDKKEDEVGVVVDLGGTTCVGVFKNGR                                                                                    |      |      |      |      |      |      | 49   |  |
| Mortalin/1-679 | 1   | MISASRAAAARLVGAAASRGPTAARHQDSWNGLSHEAFRLV---SRRDYASEAIGKAVVVDLGGTTCVAVMEGKQ                                                            |      |      |      |      |      |      | 74   |  |
| DnaK/1-638     | 1   | -----MGKIGIDLGGTTCVVAIMDGT                                                                                                             |      |      |      |      |      |      | 23   |  |
|                |     | 30A                                                                                                                                    | 40S  | 49R  | 59V  | 69D  | 79G  | 89H  | 99D  |  |
| Hsp70/1-641    | 26  | VEI IANDQGNRTTPSYVAFTD-TERLIGDAAKNQVALNPONTVFDAKRLIGRKFDDPVVQSDMKHWPFOVINDDGDKP                                                        | 101  |      |      |      |      |      |      |  |
| Hsc70/1-646    | 26  | VEI IANDQGNRTTPSYVAFTD-TERLIGDAAKNQVAMNPNTVFDAKRLIGRRFDDAVVQSDMKHWPFMVVDNAGR                                                           | 101  |      |      |      |      |      |      |  |
| SSA1/1-642     | 24  | VDI IANDQGNRTTPSYVAFTD-TERLIGDAAKNQAMNPNTVFDAKRLIGRNFNDPEVQADMKHFPKLIDVDGKP                                                            | 99   |      |      |      |      |      |      |  |
| BIP/1-654      | 50  | VEI IANDQGNRTTPSYVAFTDEGERLIGDAAKNQLTSPENTVFDKRLIGRTWNPVQDDIKFLPKVVEKKTTP                                                              | 126  |      |      |      |      |      |      |  |
| Mortalin/1-679 | 75  | AKVLENAEGARTTPSYVAFTADGERLVGMPAKRQAVTNPNTFYATKRLIGRRYDDPEVQDKIKNVFKIVRASNGD                                                            | 151  |      |      |      |      |      |      |  |
| DnaK/1-638     | 24  | PRVLENAEGDRTTPSI IAYTQDGETLVGQPAKRQAVTNPQNTLFAIKRLIGRRFQDEEVQRDVSIMPFKIIAADNGD                                                         | 100  |      |      |      |      |      |      |  |
|                |     | 109-                                                                                                                                   | 118E | 128K | 138P | 148A | 158T | 168N |      |  |
| Hsp70/1-641    | 102 | KVQVSYK-GETKAFYP E EISSMVLTKMKEIAEAYLGYPVTVNAVITVPAYFNDSQRQATKDAGVIAGLNVLRIINEPT                                                       | 177  |      |      |      |      |      |      |  |
| Hsc70/1-646    | 102 | KVQVEYK-GETKSFYP E EISSMVLTKMKEIAEAYLGKTVTNAVITVPAYFNDSQRQATKDAGVIAGLNVLRIINEPT                                                        | 177  |      |      |      |      |      |      |  |
| SSA1/1-642     | 100 | QIQVEFK-GETKNFTPE EISSMVLGKMKETAESYLGAKVNDVAVTVPAYFNDSQRQATKDAGVIAGLNVLRIINEPT                                                         | 175  |      |      |      |      |      |      |  |
| BIP/1-654      | 127 | YIQVDIGGGQTKTFAP E EISAMVLTMKKETA EAYLGKVTTHAVTVPAYFNDAQRQATKDAGVIAGLNVMRIINEPT                                                        | 203  |      |      |      |      |      |      |  |
| Mortalin/1-679 | 152 | A-WVE---AHGKLYSP SQIGAFVLMKMKETAENYLGHAKNAVITVPAYFNDSQRQATKDAGVISGLNVLRIINEPT                                                          | 224  |      |      |      |      |      |      |  |
| DnaK/1-638     | 101 | A-WVE---VKGQKMAP PQISA E V L K M K K T A E D Y L G E P V T E A V I T V P A Y F N D A Q R Q A T K D A G R I A G L E V K R I I N E P T   | 173  |      |      |      |      |      |      |  |
|                |     | 178A                                                                                                                                   | 188T | 198F | 208S | 215  | 224G | 234D | 244E |  |
| Hsp70/1-641    | 178 | AAAIAYGLDRTGKGERNVLI FDLGGGTFDVSILTI DD---GIFEVKATAGDTHLGGEDFDNR LVNHVFEEFKRKHK                                                        | 250  |      |      |      |      |      |      |  |
| Hsc70/1-646    | 178 | AAAIAYGLDKKVGAEENVLI FDLGGGTFDVSILTI ED---GIFEVKSTAGDTHLGGEDFDNRMVNHVIAEFKRRKHK                                                        | 250  |      |      |      |      |      |      |  |
| SSA1/1-642     | 176 | AAAIAYGLDKKGGK-EEHVLIFDLGGGTFDVSLLSIED---GIFEVKATAGDTHLGGEDFDNR LVNHVIAEFKRRKHK                                                        | 247  |      |      |      |      |      |      |  |
| BIP/1-654      | 204 | AAAIAYGLDKRE-GEKNI LV FDLGGGTFDVSLLTIDN---GVFEVATNGDTHLGGEDFDQRVMEHFIKLYKKTG                                                           | 275  |      |      |      |      |      |      |  |
| Mortalin/1-679 | 225 | AAALAYGLDKS E--DKVIAVYDLGGGTFDISLEIQK---GVFEVKSTNGDTHLGGEDFDQALLRHVKEFKRET                                                             | 295  |      |      |      |      |      |      |  |
| DnaK/1-638     | 174 | AAALAYGLDKGT-GNRTIAVYDLGGGTFDISIIEIDVDEGKTFEVKATNGDTHLGGEDFDSRLINYLVEEFKDKQD                                                           | 249  |      |      |      |      |      |      |  |
|                |     | 254S                                                                                                                                   | 264R | 274L | 284I | 290G | 300A | 310F | 320A |  |
| Hsp70/1-641    | 251 | KDISQNKRAVRRLRTACERAKRTLSSSTQASLEIDSLFE---GIDFYTSITRARFEELCSDLFRSTLEPVEKALRD                                                           | 323  |      |      |      |      |      |      |  |
| Hsc70/1-646    | 251 | KDISENKRAVRRLRTACERAKRTLSSSTQASLEIDSLFE---GIDFYTSITRARFEELNADLFRGTLDPVEKALRD                                                           | 323  |      |      |      |      |      |      |  |
| SSA1/1-642     | 248 | KDLSTNQRALRRLRTACERAKRTLSSSAQTSVEIDSLFE---GIDFYTSITRARFEELNADLFRSTLDPVEKALRD                                                           | 320  |      |      |      |      |      |      |  |
| BIP/1-654      | 276 | KDVRKDNRAVQLRRERVEKAKRALSSQHQARIEIESFYE---GEDFSETLRAKFEELNADLFRSTMKPVQKVL                                                              | 348  |      |      |      |      |      |      |  |
| Mortalin/1-679 | 296 | VDLTKDNMALQRVREAAEKAKCE LSSSVQTDINLPYLTMDSSGPKHLNMLTRAQFEGIVTDLIRRTIAPCQKAMQD                                                          | 372  |      |      |      |      |      |      |  |
| DnaK/1-638     | 250 | IDLRLNDP LAMQRLKEAAEKAKI E L S S A Q Q T D V N L P Y I T A D A T G P K H M N I K V T R A K L E S L V E D L V N R S I E P L K V A L Q D | 326  |      |      |      |      |      |      |  |
|                |     | 330Q                                                                                                                                   | 340S | 350L | 360N | 370A | 380L | 390D |      |  |
| Hsp70/1-641    | 324 | AKLDKAQIHDLVLVGGSTRIPKVQLLQDFNNGRDLNKSINPDEAVAYGAAVQAAI LMGDKSENVDL LLDVAPLS                                                           | 400  |      |      |      |      |      |      |  |
| Hsc70/1-646    | 324 | AKLDKSIHDLVLVGGSTRIPKIQKLQDFNNGKELNKSINPDEAVAYGAAVQAAI LSGDKSENVDL LLDVTPLS                                                            | 400  |      |      |      |      |      |      |  |
| SSA1/1-642     | 321 | AKLDKSQVDEIVLVGGSTRIPKVQLVTDYFNGKEPNRSINPDEAVAYGAAVQAAI LTGDESSKTQD LLDVAPLS                                                           | 397  |      |      |      |      |      |      |  |
| BIP/1-654      | 349 | SDLKSSDIDEIVLVGGSTRIPKIQKLVEFFNGKEPSRGINPDEAVAYGAAVQAGVLSGDQD--TGDVLLDVCPL                                                             | 423  |      |      |      |      |      |      |  |
| Mortalin/1-679 | 373 | AEVSKSDIEGIVLVGGTRMPKVQQTVDLFG-GRAPSKAVNPDEAVAYGAAIQGGVLAGD---VTDVLLDVTPL                                                              | 444  |      |      |      |      |      |      |  |
| DnaK/1-638     | 327 | AGLSVSDIDDVIVLVGGTRMPMVQKVAEFF-GKEPRKDVNPDEAVAYGAAVQGGVLTGD---VKDVL LLDVTPLS                                                           | 398  |      |      |      |      |      |      |  |
|                |     | 410M                                                                                                                                   | 420I | 430T | 440I | 450T | 460E | 470G |      |  |
| Hsp70/1-641    | 401 | LGL ETAGGVMTALIKRNTIPTKQTQIFTTYSDNQPVLIQVYEGERAMTKDNNLLGRFELSGIPAPRGVPQIEVT                                                            | 477  |      |      |      |      |      |      |  |
| Hsc70/1-646    | 401 | LGI ETAGGVMTVLIKRNNTIPTKQTQFTTTYSDNQPVLIQVYEGERAMTKDNNLLGKFEELTGIPAPRGVPQIEVT                                                          | 477  |      |      |      |      |      |      |  |
| SSA1/1-642     | 398 | LGI ETAGGVMTKLI PRNSTIPTKKEIFSTYADNQPVLIQVFEGERAKTKDNNLLGKFEELSGIPAPRGVPQIEVT                                                          | 474  |      |      |      |      |      |      |  |
| BIP/1-654      | 424 | LGI ETAGGVMTKLI PRNTVVPTKKSQIFSTASDNQPTVLIQVYEGERLTKDNNLLGTFDLTGIPAPRGVPQIEVT                                                          | 500  |      |      |      |      |      |      |  |
| Mortalin/1-679 | 445 | LGI ETLGGVFTKLI NRNTIPTKKSQVFSTAADGQTQVEIKVCGGEREMAGDNKLLGQFTLIGIPAPRGVPQIEVT                                                          | 521  |      |      |      |      |      |      |  |
| DnaK/1-638     | 399 | LGI ETMGGVMTL IAKNNTIPTKHSQVFSTAEDNQSAVTIHLVQGERKRAADNKS LGQFNLDGINPAPRGMPQIEVT                                                        | 475  |      |      |      |      |      |      |  |
|                |     | 480I                                                                                                                                   | 490A | 500K | 510L | 520Q | 530E | 540N | 550K |  |
| Hsp70/1-641    | 478 | FDIDANGILNVTATDKSTGKANKITITNDKGRLSKEEIERMVQEAKEYKA EDEVQRERVS AKNALESYAFNMKSAVE                                                        | 554  |      |      |      |      |      |      |  |
| Hsc70/1-646    | 478 | FDIDANGILNVS AVDKSTGKENKITITNDKGRLSKEDI ERMVQEAKEYKA EDEKQRDKVSSKNSLESYAFNMKATVE                                                       | 554  |      |      |      |      |      |      |  |
| SSA1/1-642     | 475 | FDVDSNGILNVS AVKGTGKSNKITITNDKGRLSKEDI EKMVAEAEKFEDEKESQR IASKNQLLES IAYS LKNTIS                                                       | 551  |      |      |      |      |      |      |  |
| BIP/1-654      | 501 | FEIDVNGILRVTAEDKGTGNKKNKITITNDQNR LTP E E I E R M V N D A E K F A E D K K L K E R I D T R N E L E S Y A S L K N Q I G                  | 577  |      |      |      |      |      |      |  |
| Mortalin/1-679 | 522 | FDIDANGIVHVS AKDKGTGR EQQIVIQSS-GGLSKDDI ENMVKNAKEYAEEDRRKKERVEAVNMAEGIIHDTETKME                                                       | 597  |      |      |      |      |      |      |  |
| DnaK/1-638     | 476 | FDIDADGILHVS AKDKNSGKEQKITIKAS-SGLNEDEIQKMRDAEANA EADRKF EELVQTRNQGDHLLHSTRKQVE                                                        | 551  |      |      |      |      |      |      |  |
|                |     | 559K                                                                                                                                   | 569K | 579S | 589K | 599L | 609G | 618- | 623G |  |
| Hsp70/1-641    | 555 | D-EGLKGGKISEADKKKVLDKQCEVSWLDANTLAEKDEFEHKKREL EQVCNP I ISGLYQAGGPP---G---PGGF G-                                                      | 623  |      |      |      |      |      |      |  |
| Hsc70/1-646    | 555 | D-EKLQGGKINDEDKQKILDKCNEIINWLDKNQTAKEE E FEHQQKLEKVCNP IITKLYQSAGGM---PGGMPGGFP                                                        | 627  |      |      |      |      |      |      |  |
| SSA1/1-642     | 552 | E-AG--DKLEQADKDKVTKKA EETISWLD SNTTASKEEFDKLLKELQDIANPIMSKLYQAGGAPGGAAGGAPGGFP                                                         | 625  |      |      |      |      |      |      |  |
| BIP/1-654      | 578 | DKKELGGKLSSEDKETMEKAVEEKIEWLESHQDADIEDFKAKKLEEEIVQPIISKLYGSAGPPPTGEED-----                                                             | 647  |      |      |      |      |      |      |  |
| Mortalin/1-679 | 598 | E---FKDQLPADECNKLEEKISKMR ELLARKDSETGENIRQAASSLQQASLKL FEMAYKKMASEREGSGSSGTG---                                                        | 668  |      |      |      |      |      |      |  |
| DnaK/1-638     | 552 | E---AGDKLPADDKTAIESALTALETA LKGEDKA---AIEAKMQELAQVSQKLMEIAQQQHAQQQTAGADASAN---                                                         | 619  |      |      |      |      |      |      |  |
|                |     | 631S                                                                                                                                   | 641D |      |      |      |      |      |      |  |
| Hsp70/1-641    | 624 | -AQQPKGGSGSGPTIEEVD---                                                                                                                 | 641  |      |      |      |      |      |      |  |
| Hsc70/1-646    | 628 | GGAPP SGGASSGPTIEEVD---                                                                                                                | 646  |      |      |      |      |      |      |  |
| SSA1/1-642     | 626 | GAPPA--PEAE GPTVEEVD---                                                                                                                | 642  |      |      |      |      |      |      |  |
| BIP/1-654      | 648 | TAE-----KDEL---                                                                                                                        | 654  |      |      |      |      |      |      |  |
| Mortalin/1-679 | 669 | ---EQKEDQKEEKQ-----                                                                                                                    | 679  |      |      |      |      |      |      |  |
| DnaK/1-638     | 620 | ---NAKDDDDVDAEFEEVKDKK                                                                                                                 | 638  |      |      |      |      |      |      |  |

Supplementary Fig. 3

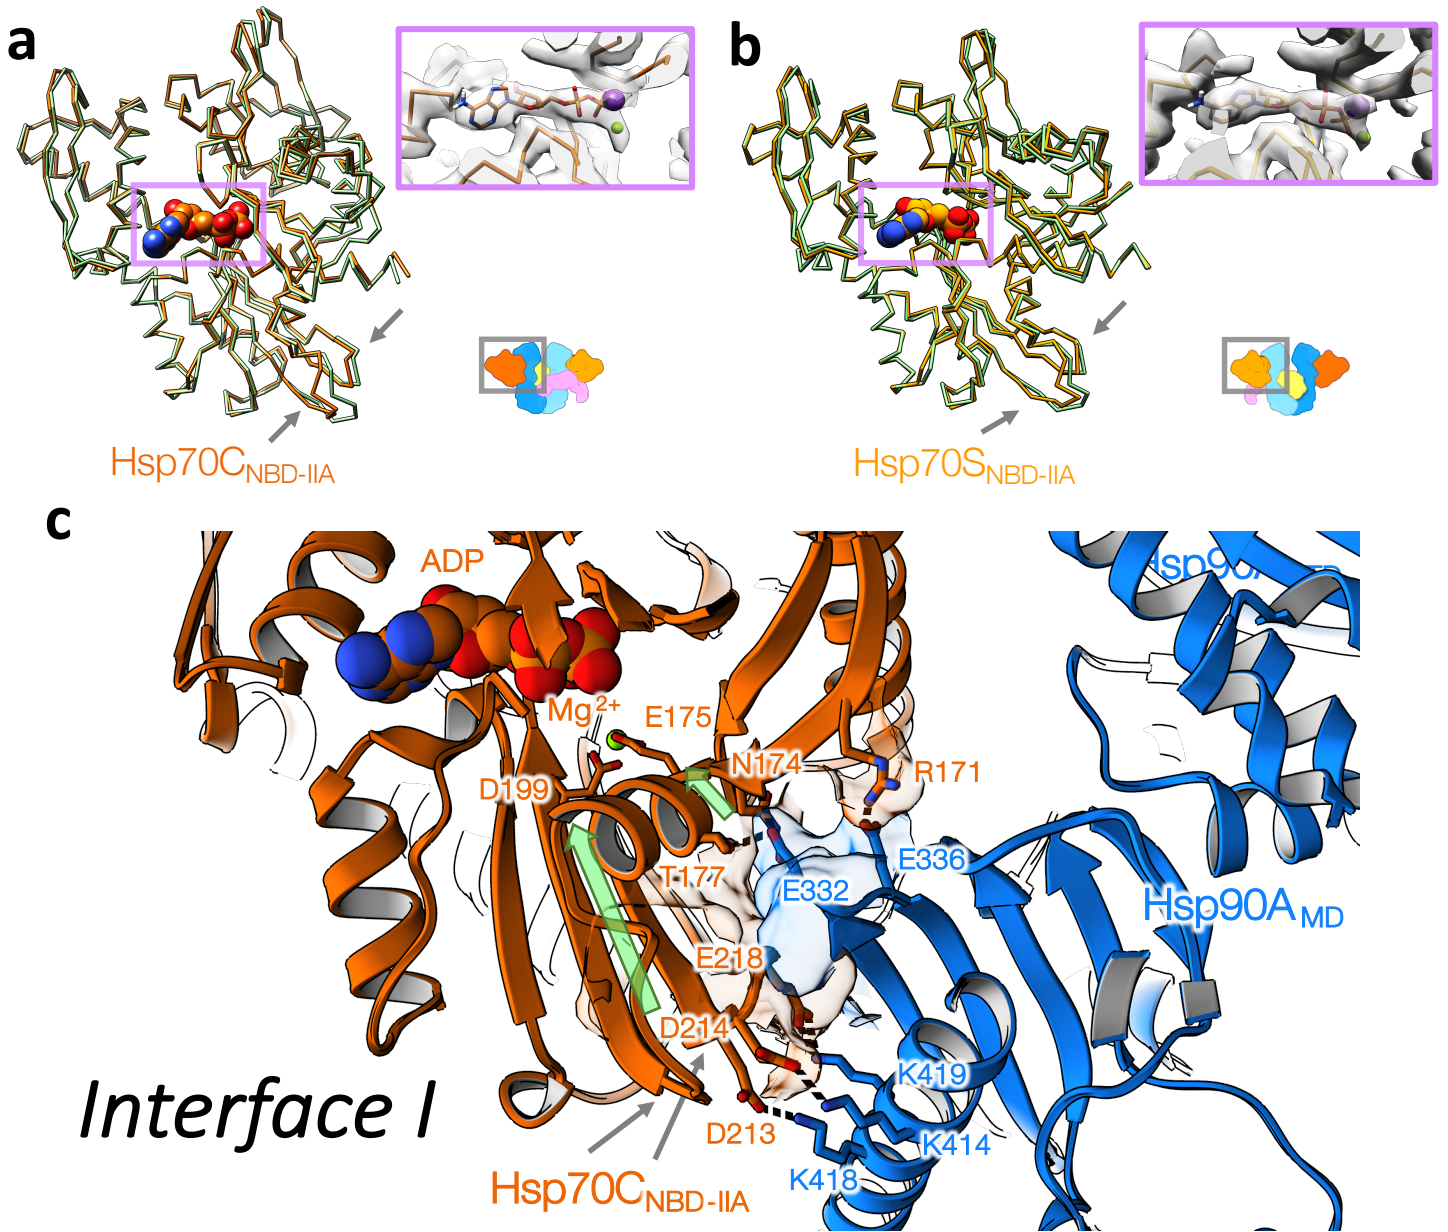

Supplementary Fig. 4

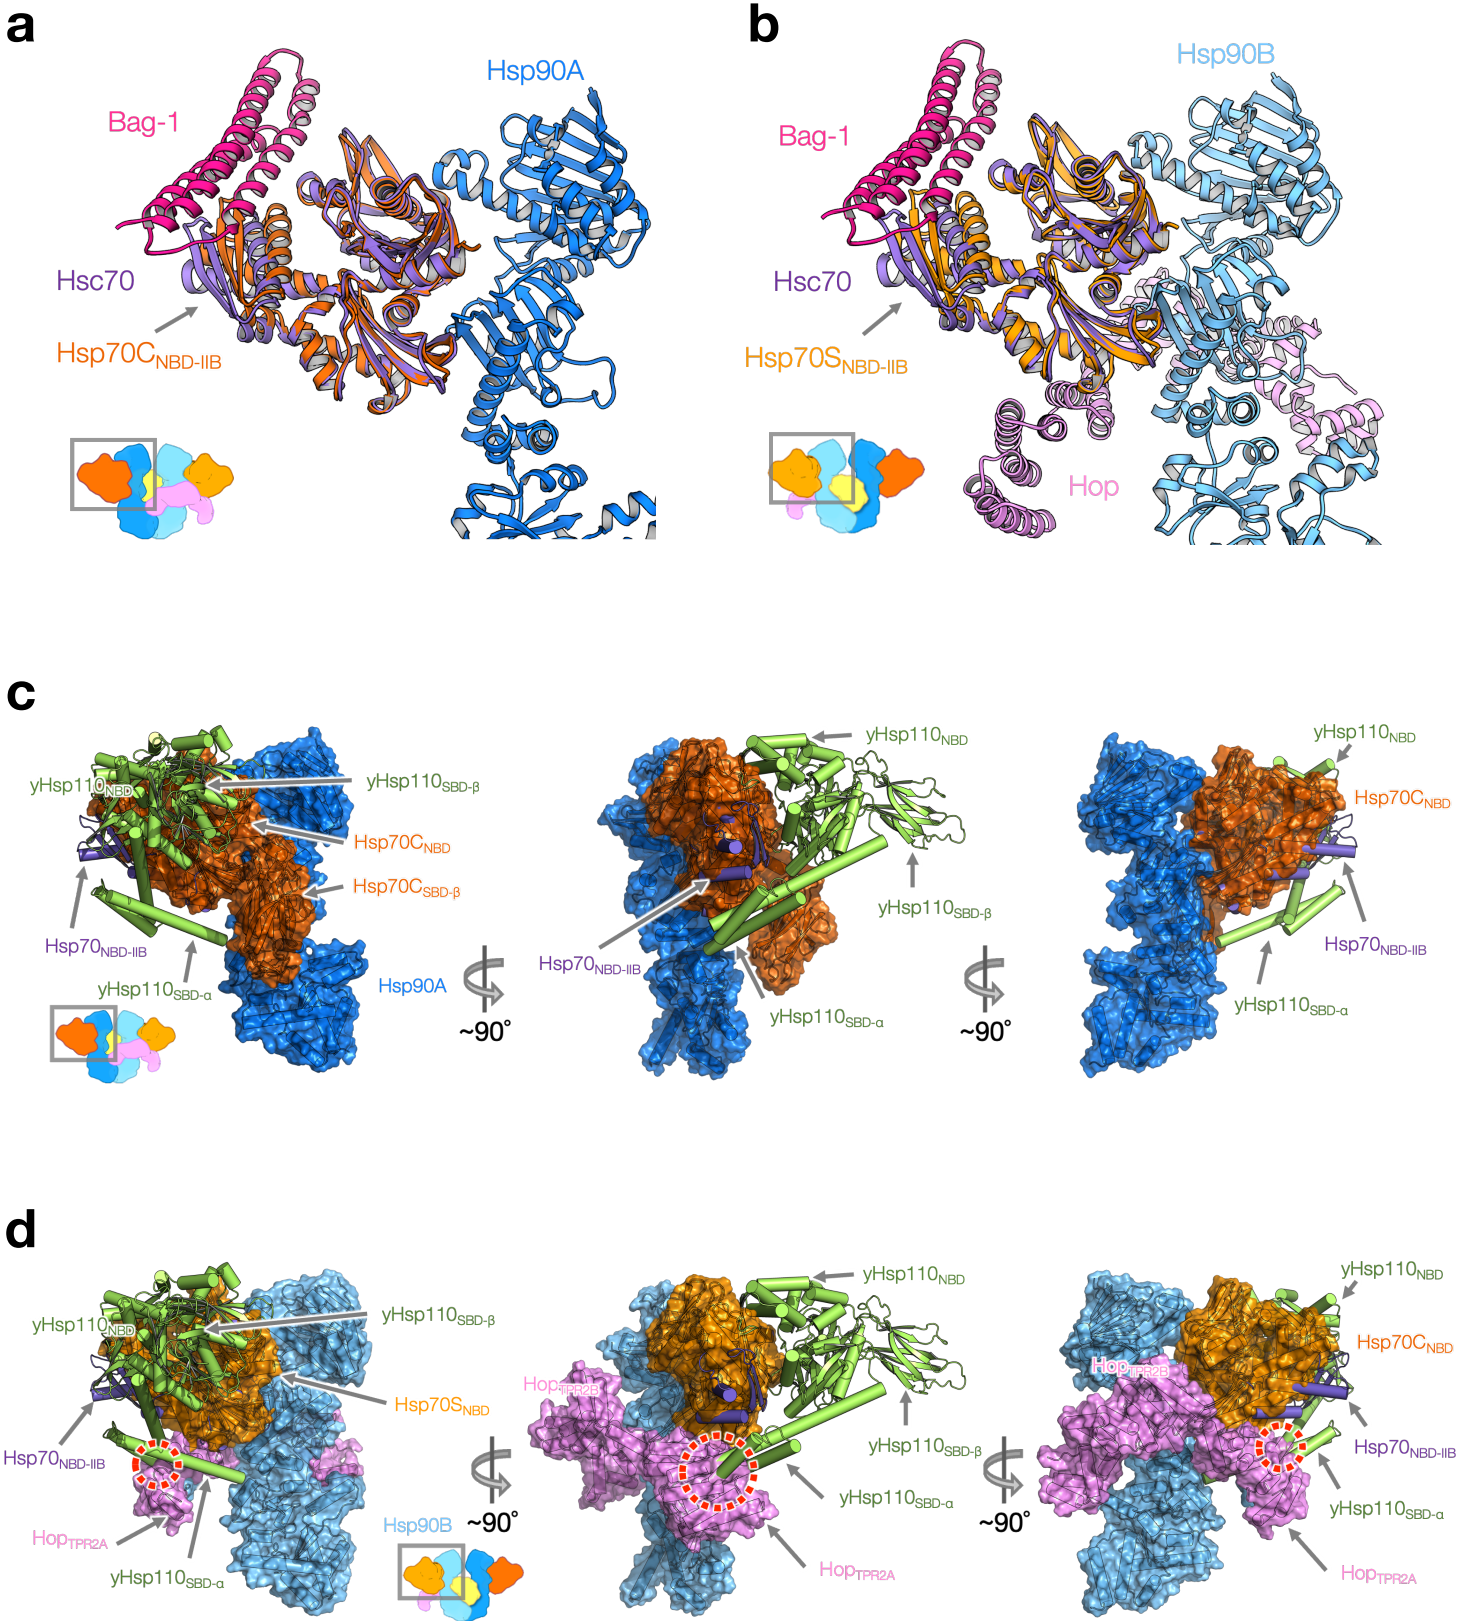

# Supplementary Fig. 5

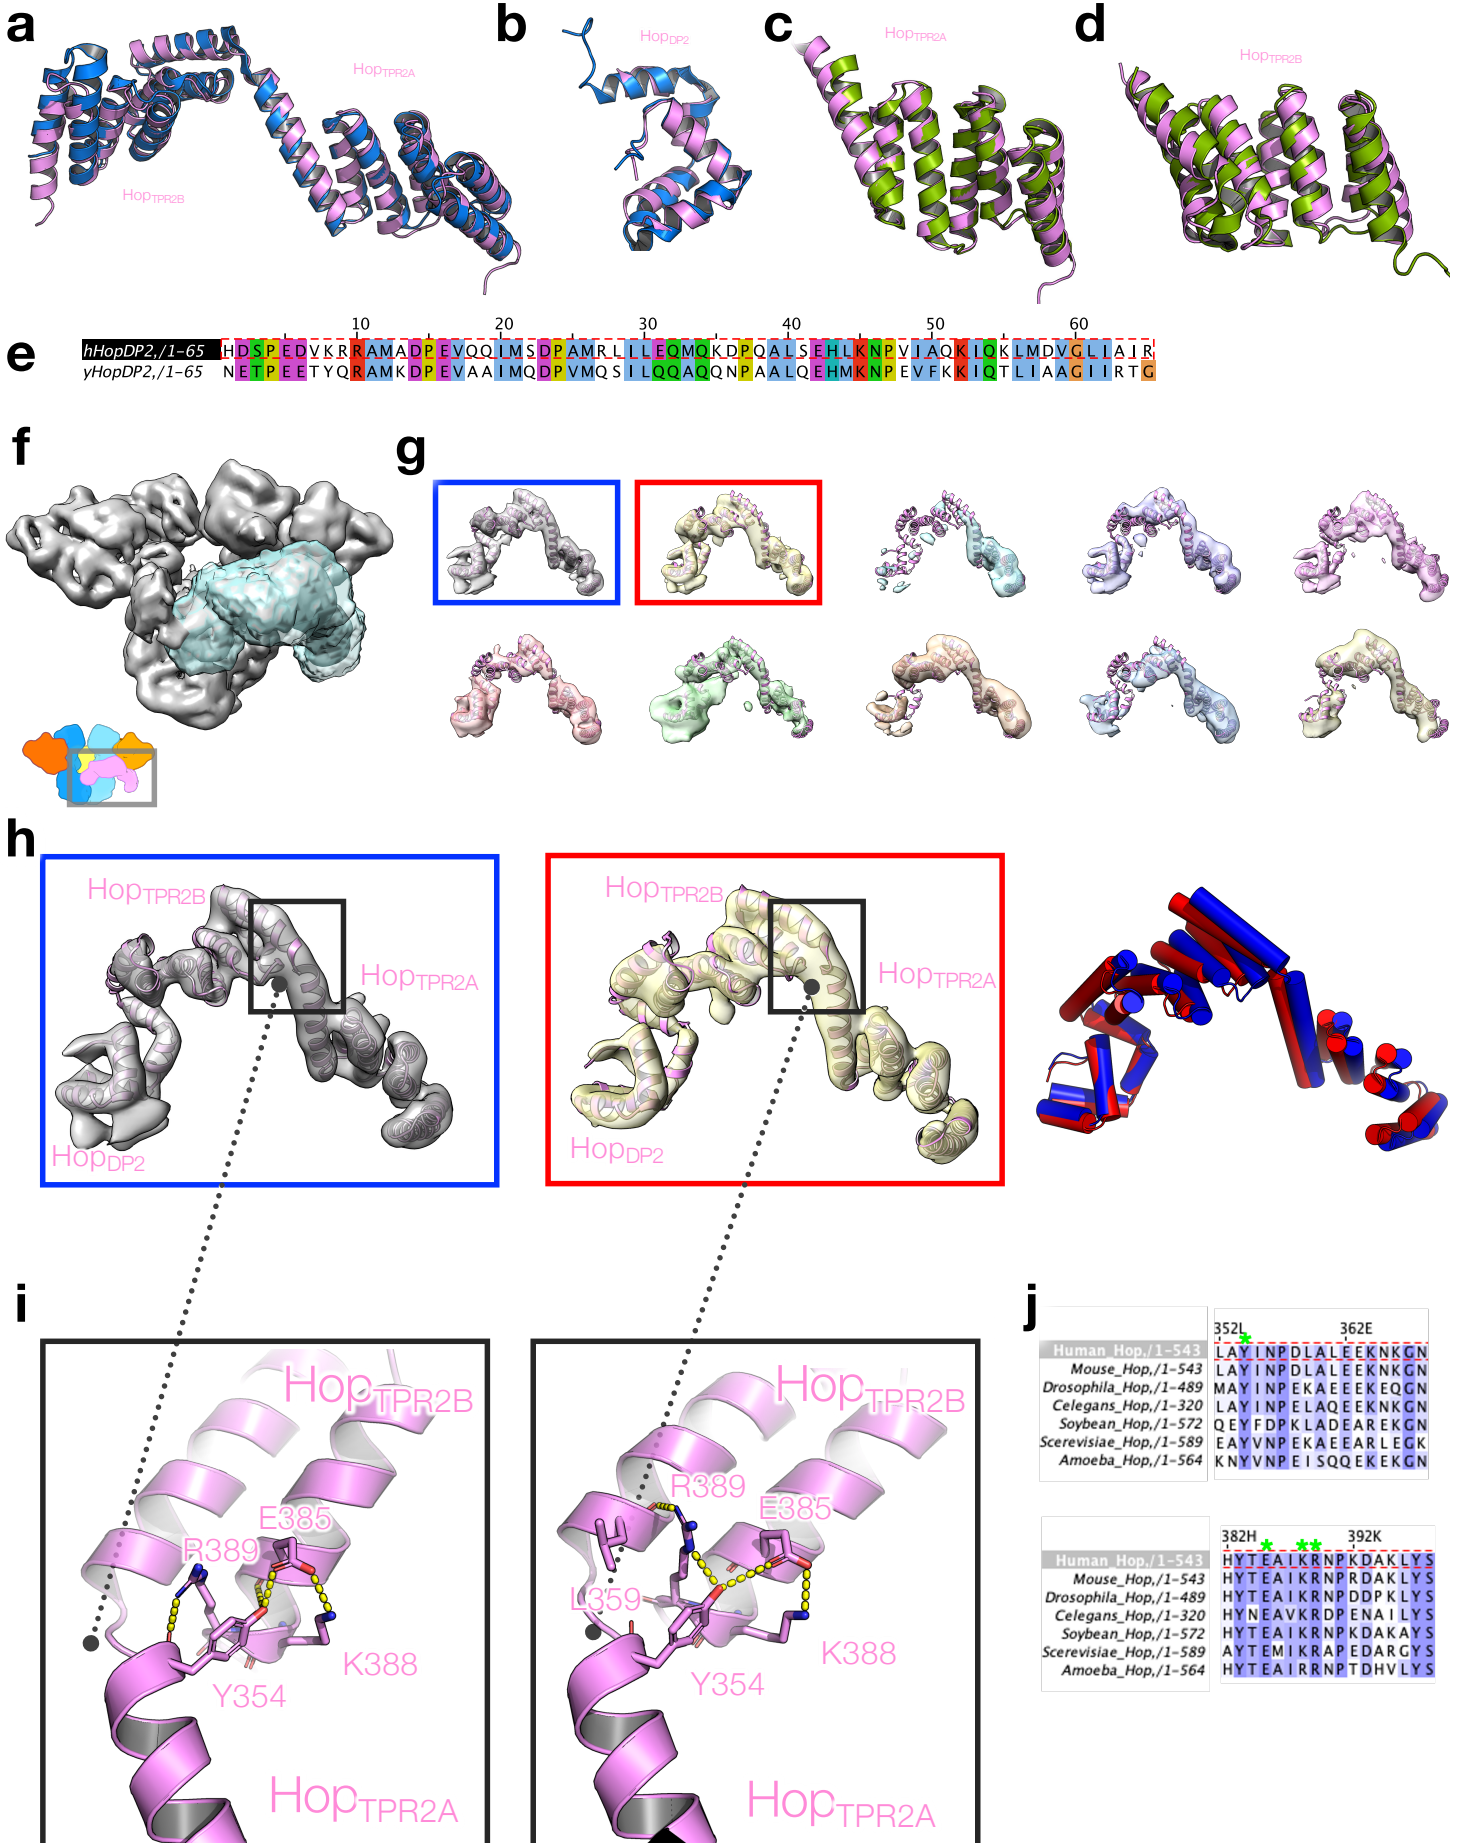

Supplementary Fig. 6

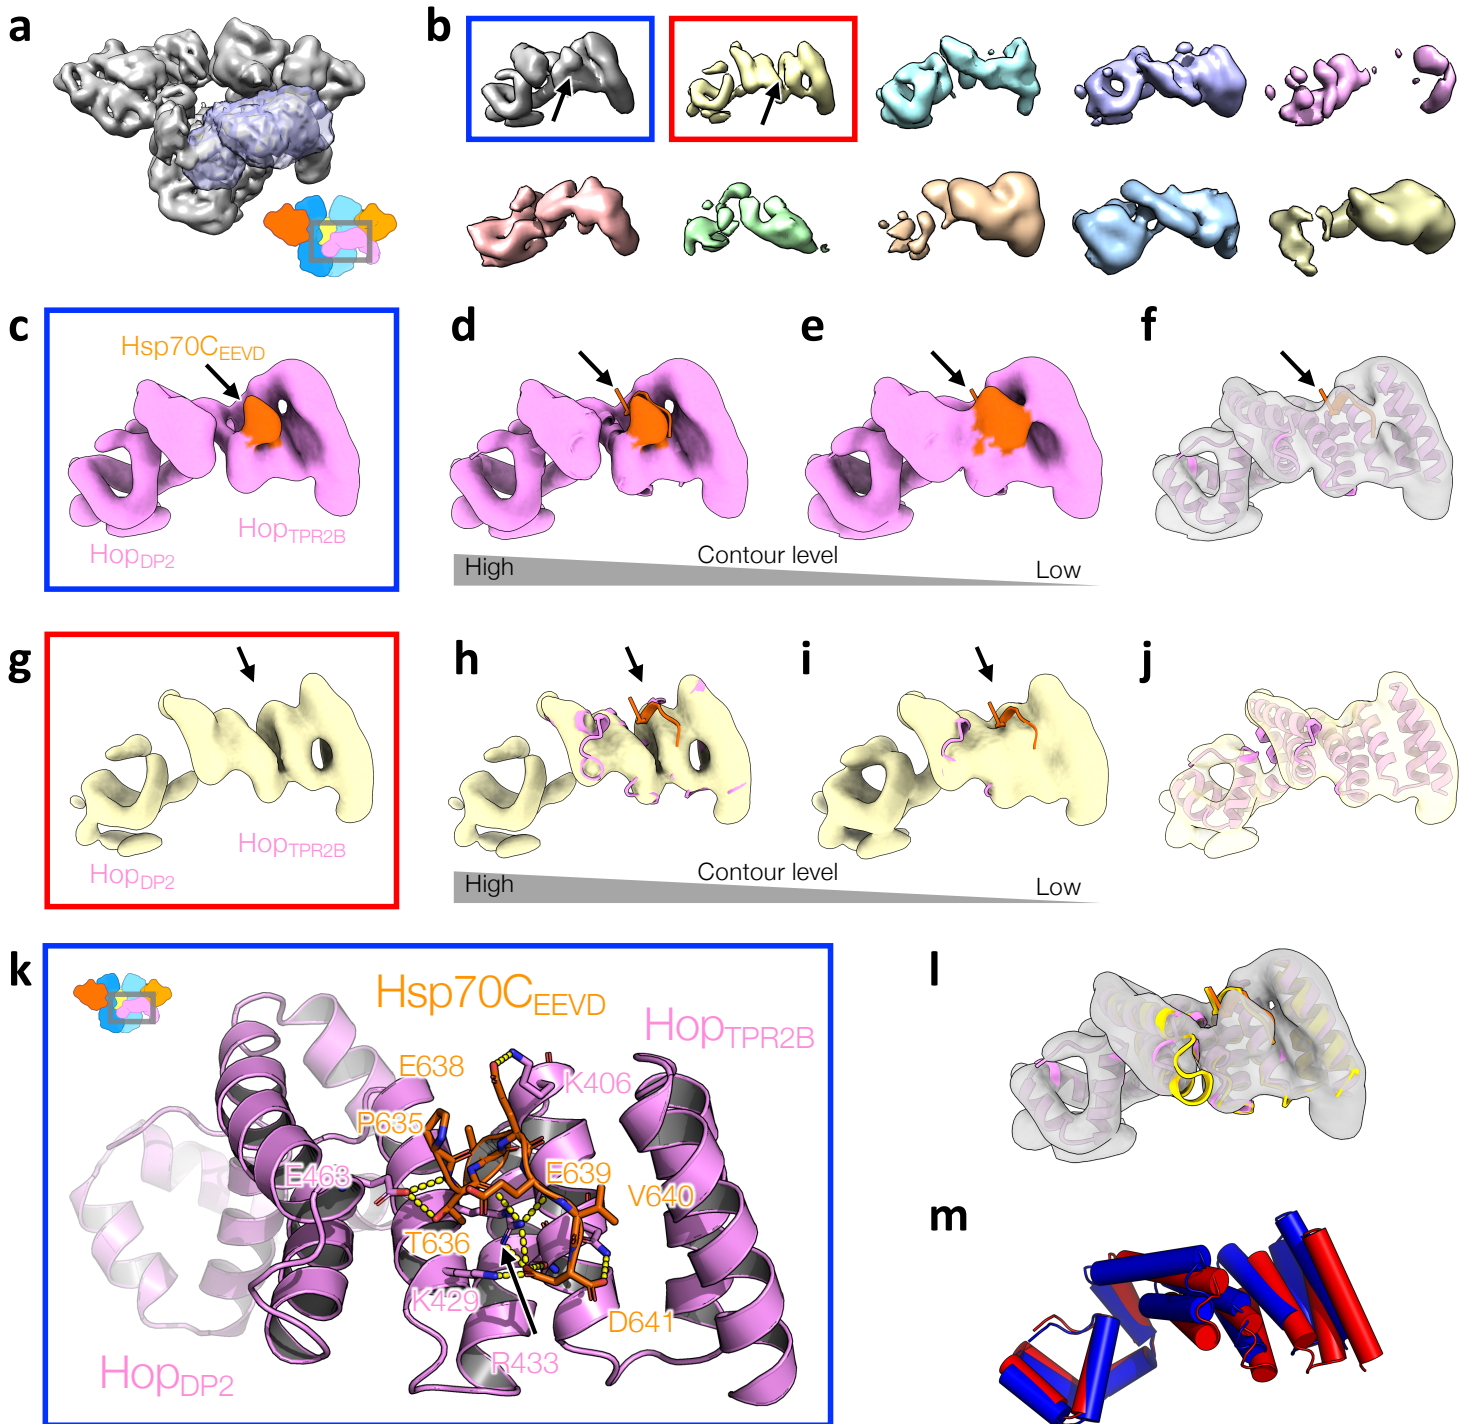

Supplementary Fig. 7

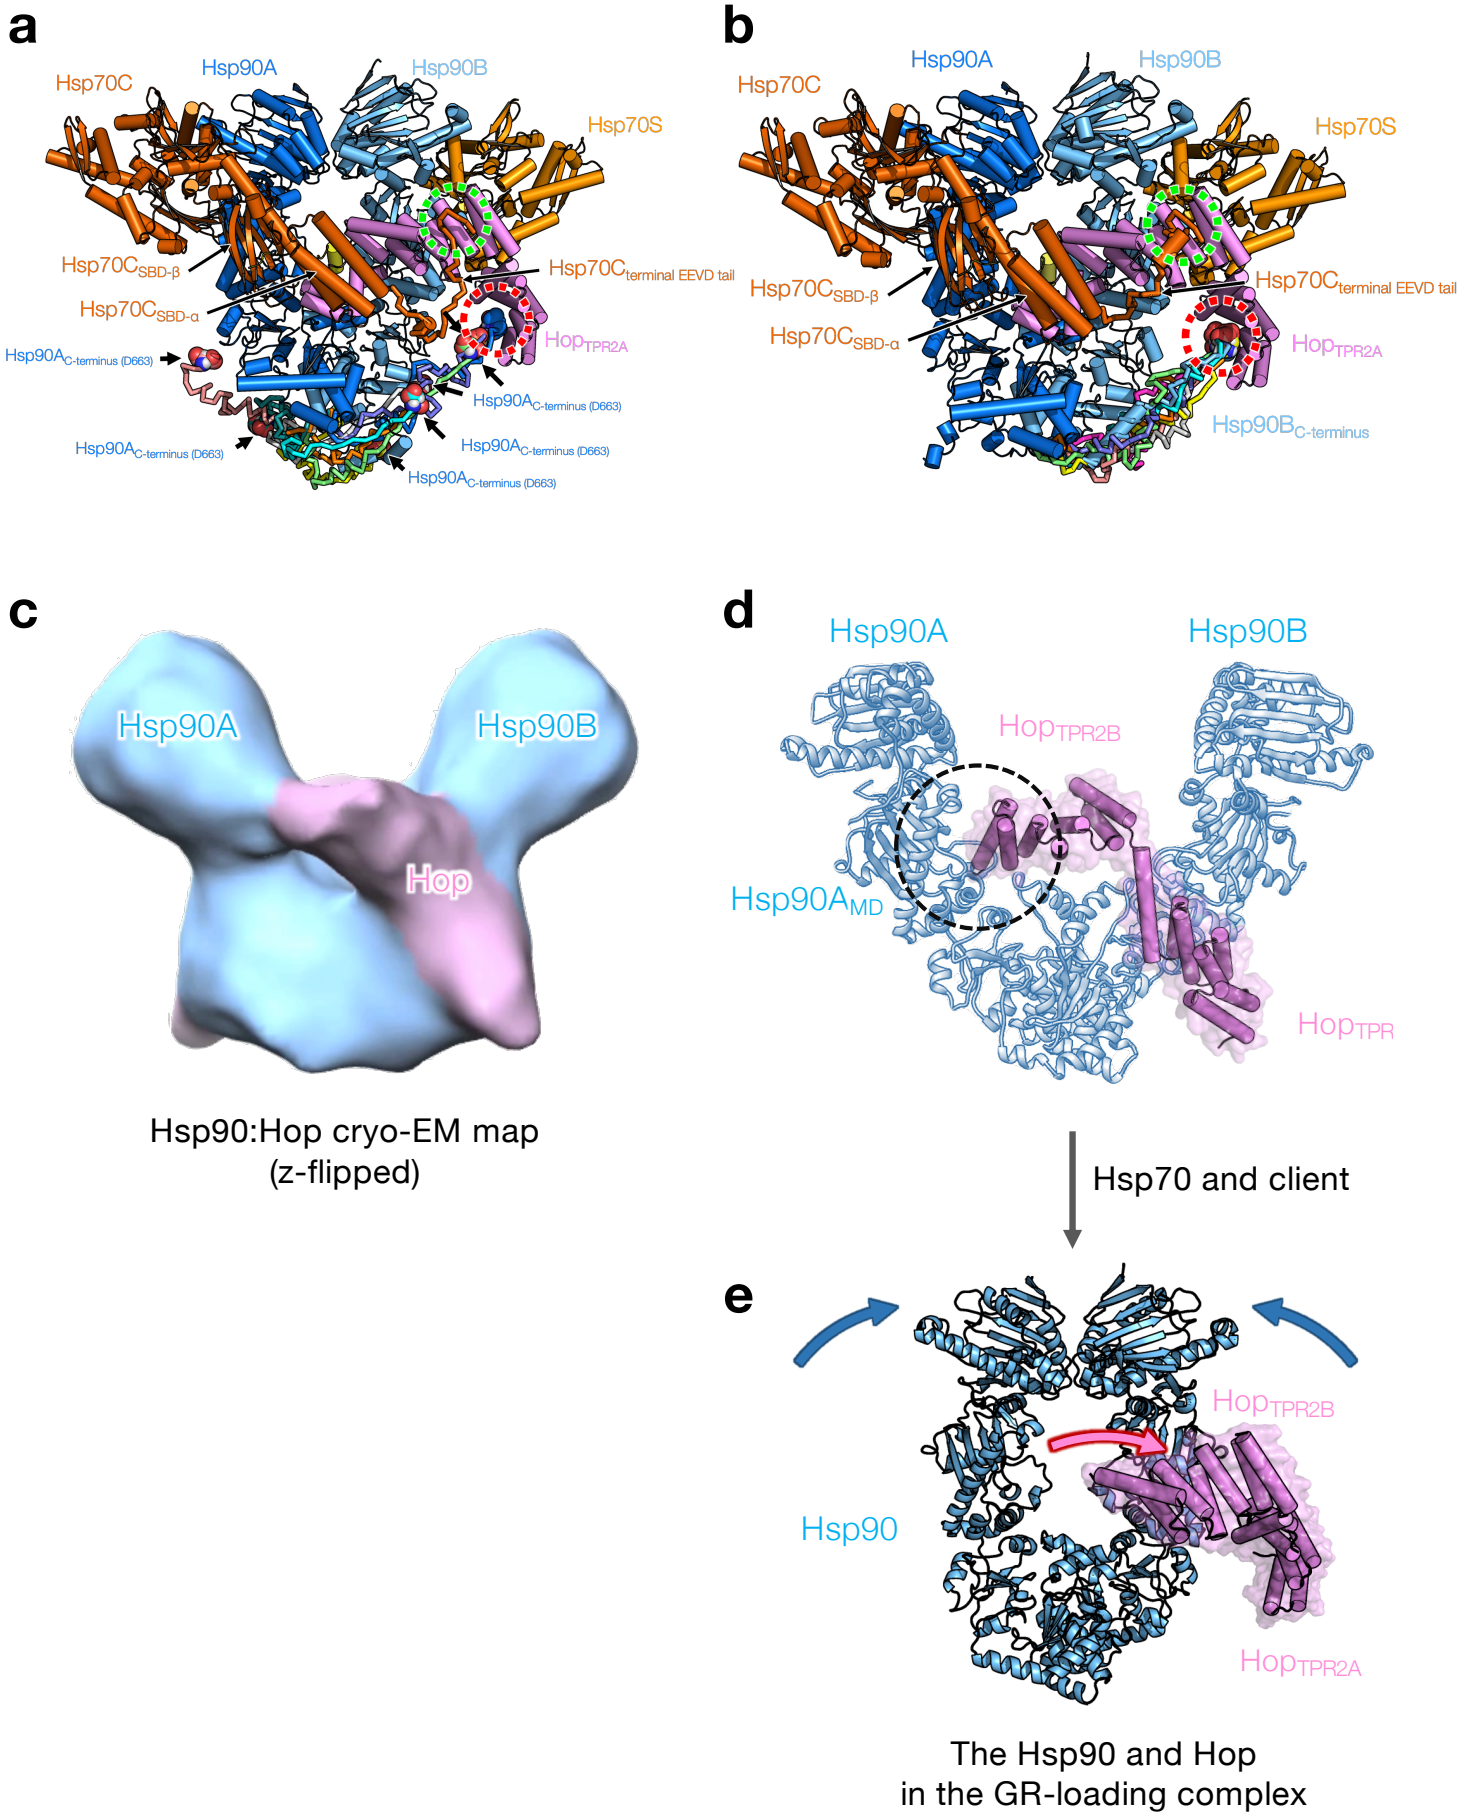



Supplementary Fig. 8

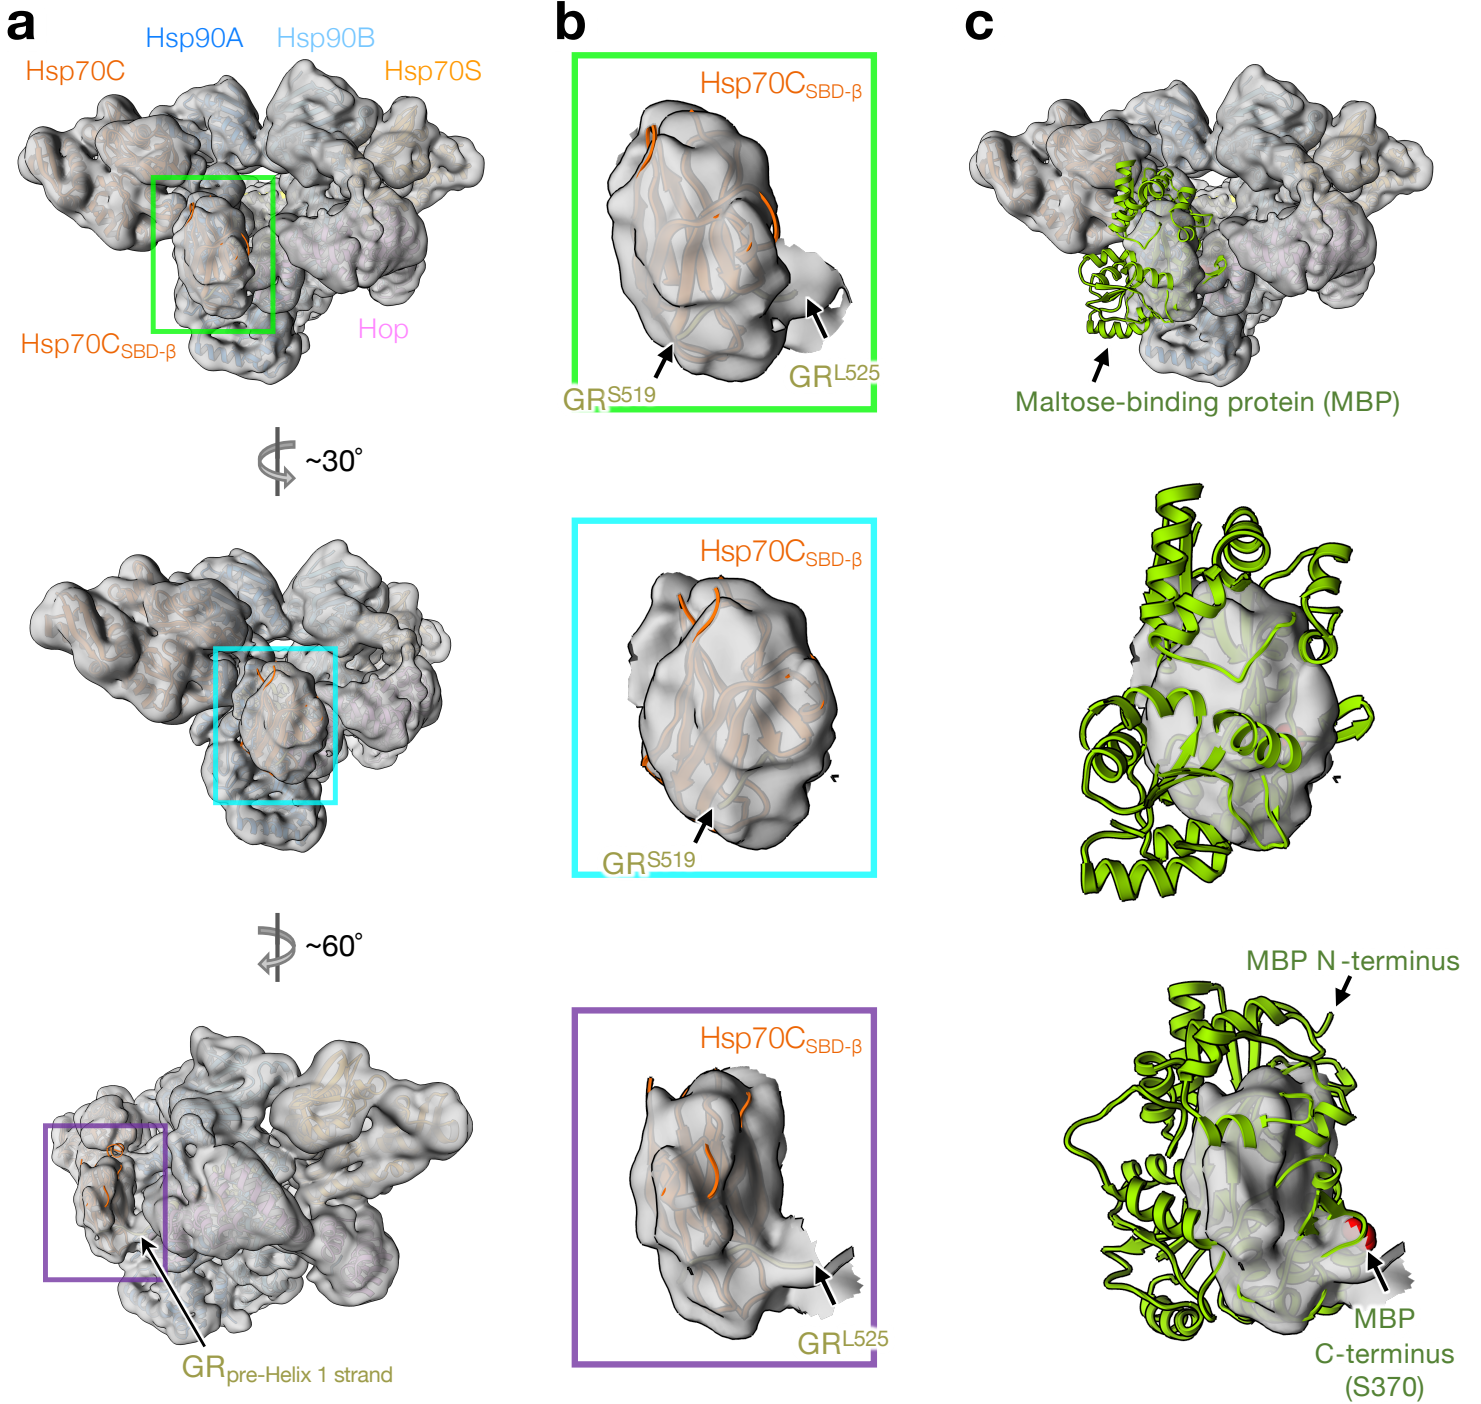

# Supplementary Fig. 9

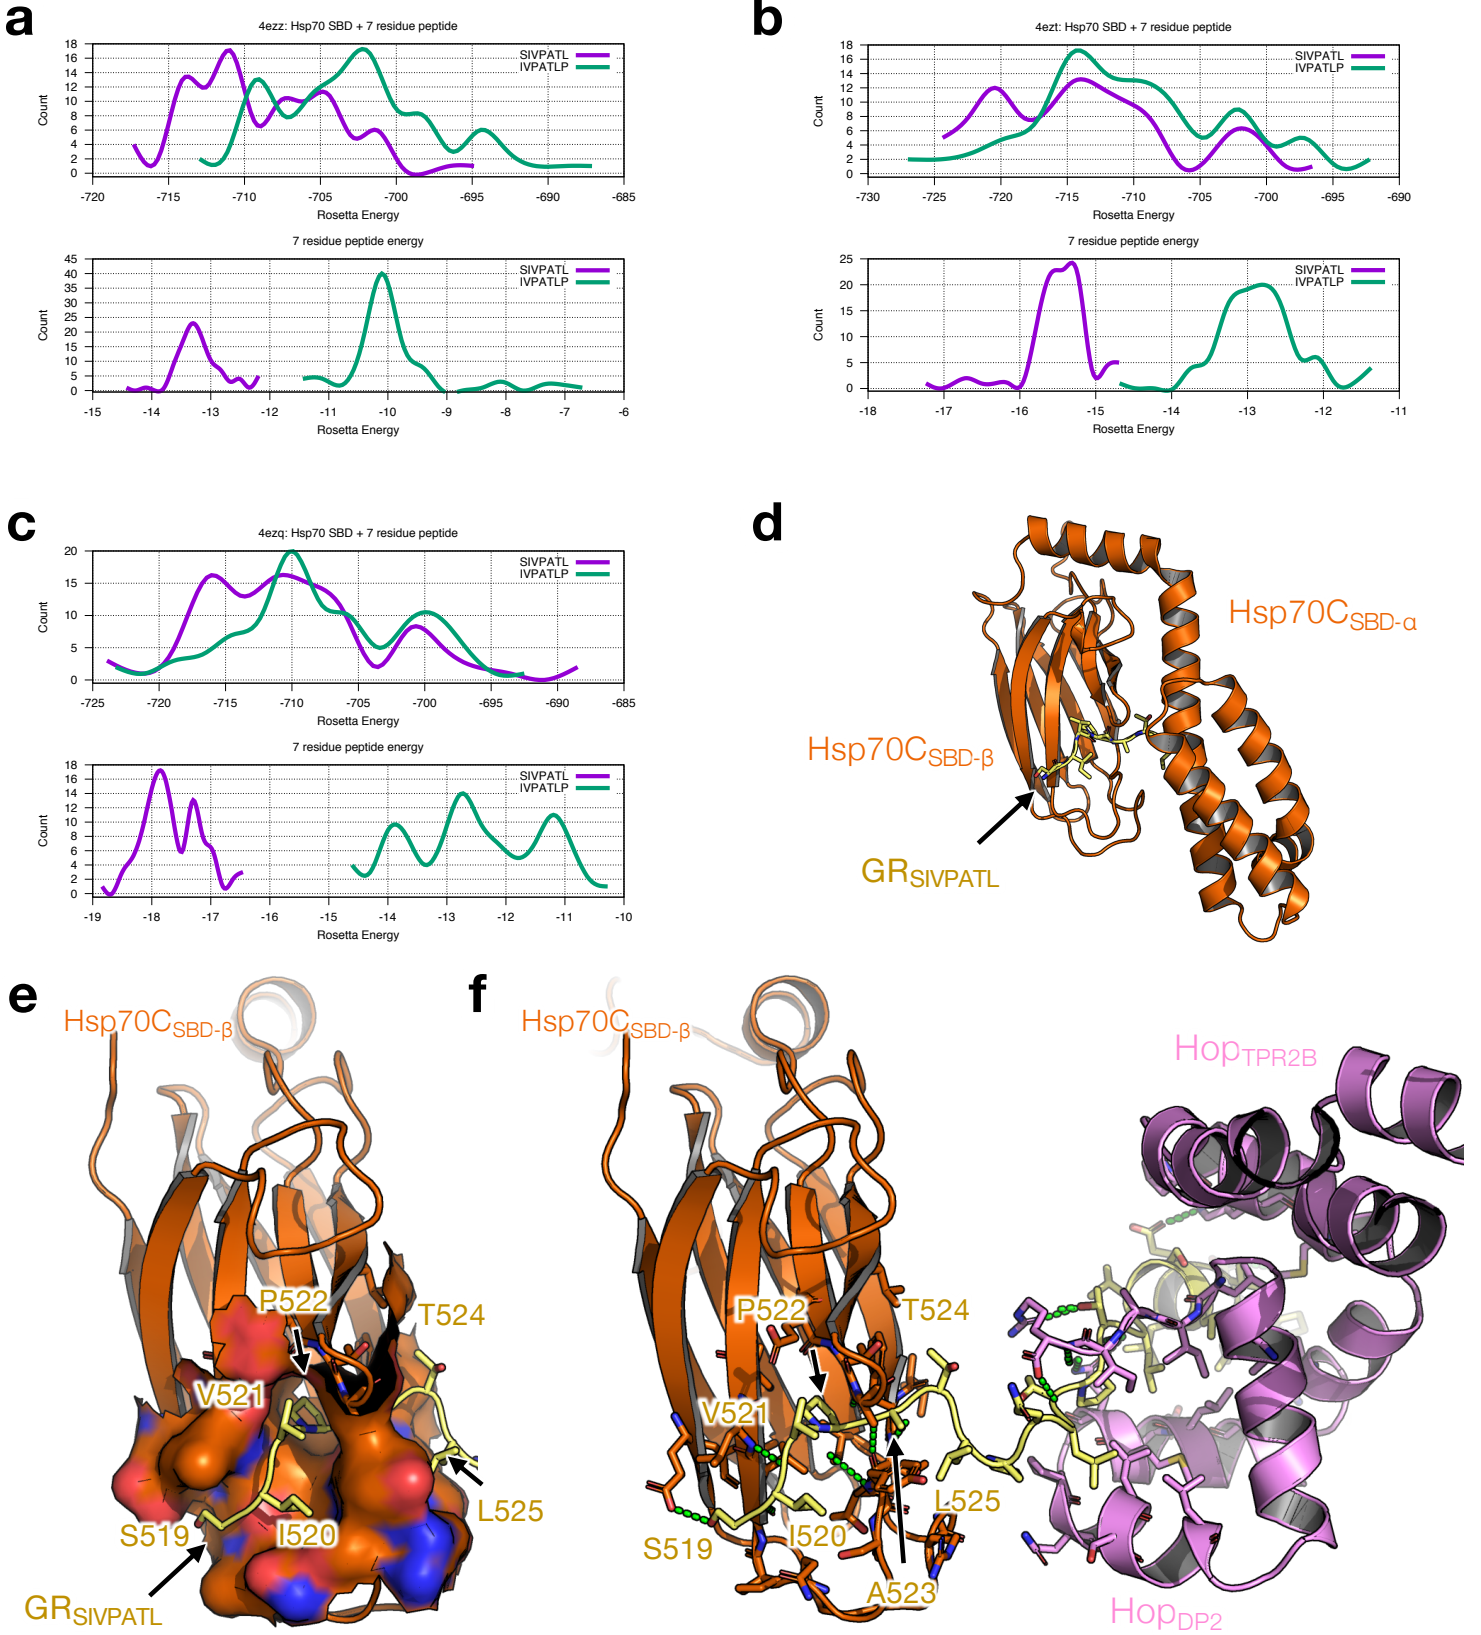

Supplementary Fig. 10

ED fig. 4f

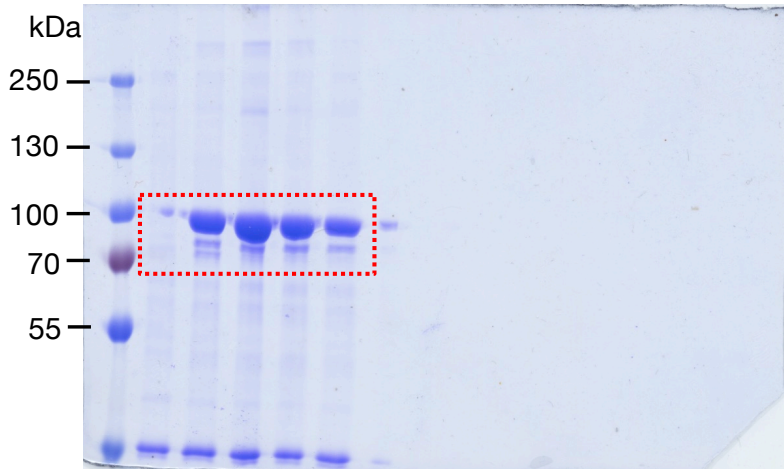

His-Hsc82 resin

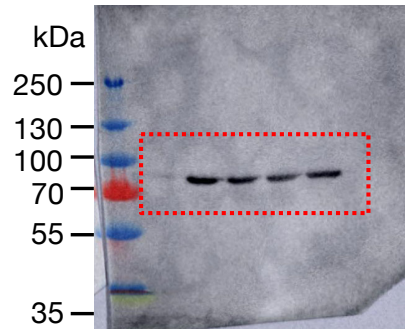

Sti1 resin

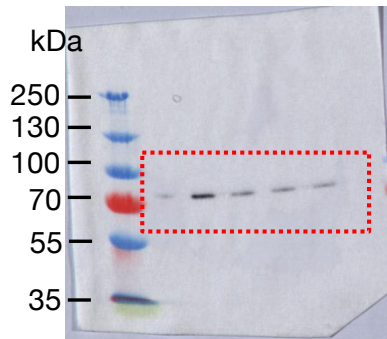

Ssa1/2 resin

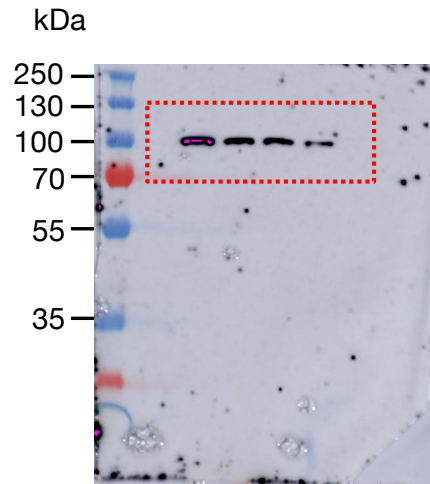

His-Hsc82 lysates

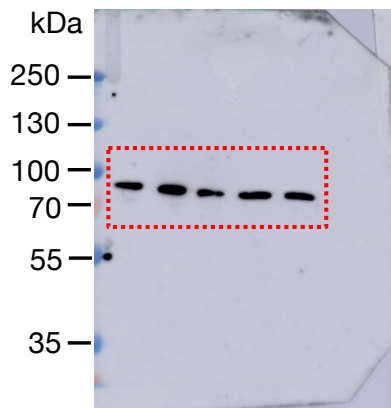

Sti1 lysates

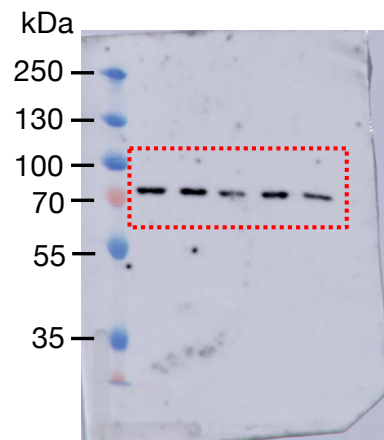

Ssa1 lysates

Supplementary Fig. 10

ED fig. 6h

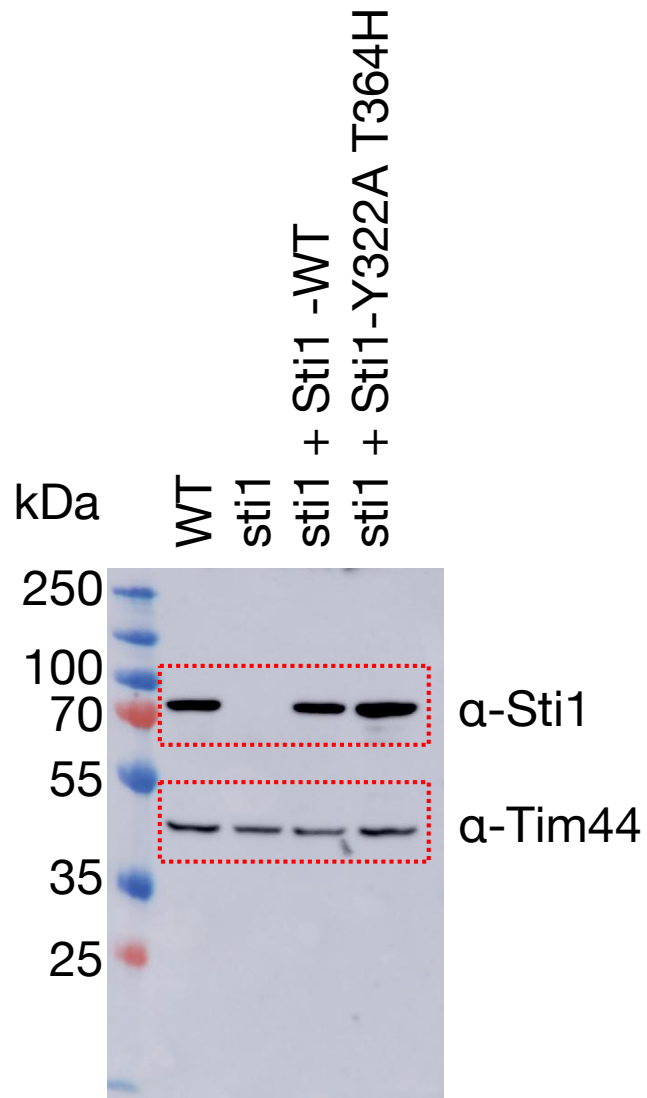

Supplementary Fig. 10

ED fig. 8f

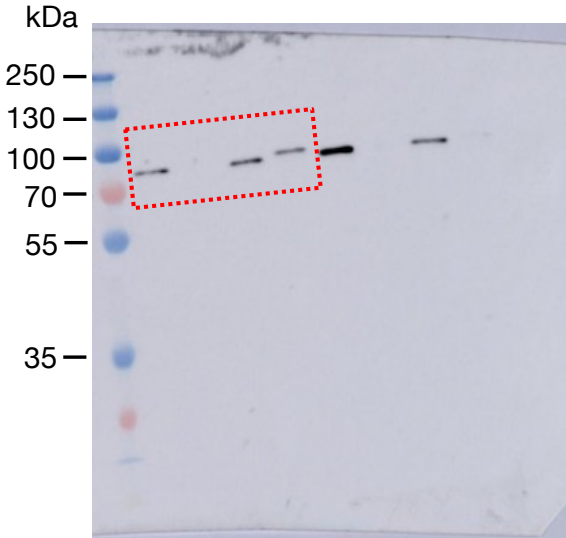

$\alpha$ -Sti1

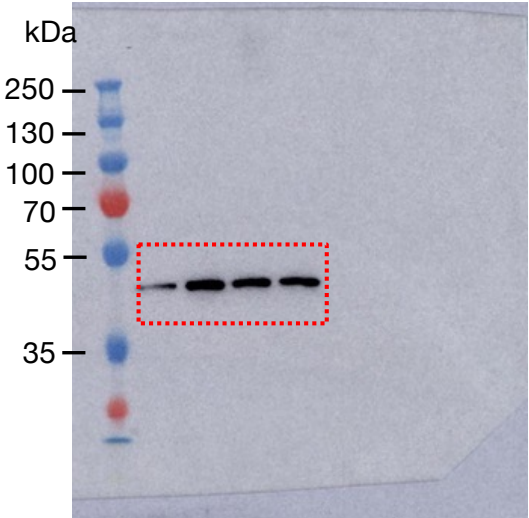

$\alpha$ -Tim44
