# Supplementary material
Source: PubMed Central journal article supplement (PMC9179170)
Supplement: NIHMS1810188-supplement-Supplemental_Tables.pdf [file NIHMS1810188-supplement-Supplemental_Tables.pdf]

**Supplementary Table 1. Cryo-EM data collection**

| Data set                                 | D93N-I       | D93N-II      | D93N-III     | D93N-IV      |
|------------------------------------------|--------------|--------------|--------------|--------------|
| Microscope                               | Titan Krios  | Titan Krios  | Titan Krios  | Titan Krios  |
| Camera                                   | K2 Summit    | K2 Summit    | K2 Summit    | K2 Summit    |
| <b>Data collection and processing</b>    |              |              |              |              |
| Magnification                            | 22,500       | 22,500       | 22,500       | 22,500       |
| Voltage (kV)                             | 300          | 300          | 300          | 300          |
| Electron Exposure ( $e^-/\text{\AA}^2$ ) | 80           | 80           | 70           | 70           |
| Exposure time (sec)                      | 12           | 16           | 14           | 14           |
| Defocus range ( $\mu\text{m}$ )          | -0.5 to -2.3 | -0.5 to -2.5 | -1.0 to -2.5 | -0.5 to -2.5 |
| Pixel Size ( $\text{\AA}/\text{pixel}$ ) | 1.059        | 1.059        | 1.059        | 1.059        |
| Micrographs collected (no.)              | 3145         | 3213         | 489          | 4248         |
| Particles picks (no.)                    | 986,519      | 1,397,986*   |              | 1,728,005    |
| Refined particles (no.)                  | 139,412      | 214,315*     |              | 282,329      |

\* Data sets II and III were merged and processed together.

**Supplementary Table 2. Cryo-EM single-particle analyses and model refinement/validation statistics**

| Map                                                       | Hsp90:Hsp70:Hop:GR                                                                | Hsp90A <sub>NTD-MD</sub> :<br>Hsp70C <sub>NBD</sub> | Hsp90B <sub>NTD-MD</sub> :<br>Hsp70S <sub>NBD</sub> | Hsp90B <sub>NTD-MD</sub> :<br>Hsp70S <sub>NBD</sub> :Hop <sub>TPR2A-TPR2B-DP2</sub> | Hsp70S <sub>NBD</sub> :Hop <sub>TPR2A</sub> | Hsp90AB <sub>CTD</sub> :Hsp70C <sub>SBD-β</sub> :<br>Hop <sub>DP2</sub> :GR <sub>Helix 1</sub> |
|-----------------------------------------------------------|-----------------------------------------------------------------------------------|-----------------------------------------------------|-----------------------------------------------------|-------------------------------------------------------------------------------------|---------------------------------------------|------------------------------------------------------------------------------------------------|
| EMDB ID                                                   | EMD-23050                                                                         | EMD-23053                                           | EMD-23054                                           | EMD-23056                                                                           | EMD-23055                                   | EMD-23051                                                                                      |
| PDB ID                                                    | 7KW7                                                                              |                                                     |                                                     |                                                                                     |                                             |                                                                                                |
| Classification type                                       | Global                                                                            | Focused<br>(signal subtraction)                     | Focused<br>(signal subtraction)                     | Focused<br>(signal subtraction)                                                     | Focused<br>(signal subtraction)             | Focused<br>(signal subtraction)                                                                |
| Resolution (Å)<br>at FSC 0.143                            | 3.57                                                                              | 3.77                                                | 3.53                                                | 3.85                                                                                | 3.64                                        | 3.46                                                                                           |
| Estimated B-factor (Å <sup>2</sup> )                      | -107.5                                                                            | -156.4                                              | -91.5                                               | -150.0                                                                              | -116.4                                      | -112.6                                                                                         |
| Refined particles (no.)                                   | 85619                                                                             | 35024                                               | 56945                                               | 37845                                                                               | 60433                                       | 43626                                                                                          |
| <b>Coordinates refinement</b>                             |                                                                                   |                                                     |                                                     |                                                                                     |                                             |                                                                                                |
| Initial models used<br>(PDB code)                         | Hsp90: 3T0H, 3Q6M, 5FWK<br>Hsp70: 3AY9, 4PO2, 4EZQ<br>Hop: 3UQ3, 2LLW<br>GR: 1M2Z |                                                     |                                                     |                                                                                     |                                             |                                                                                                |
| Resolution (Å)<br>at FSC 0.5                              | 3.99                                                                              |                                                     |                                                     |                                                                                     |                                             |                                                                                                |
| Map sharpening B-factor for<br>modeling (Å <sup>2</sup> ) | -80                                                                               |                                                     |                                                     |                                                                                     |                                             |                                                                                                |
| Model composition                                         |                                                                                   |                                                     |                                                     |                                                                                     |                                             |                                                                                                |
| Non-hydrogen atoms                                        | 21854                                                                             |                                                     |                                                     |                                                                                     |                                             |                                                                                                |
| Protein residues atoms                                    | 21796                                                                             |                                                     |                                                     |                                                                                     |                                             |                                                                                                |
| Ligand atoms                                              | 58                                                                                |                                                     |                                                     |                                                                                     |                                             |                                                                                                |
| Mean B-factor (min – max) [Å <sup>2</sup> ]               |                                                                                   |                                                     |                                                     |                                                                                     |                                             |                                                                                                |
| Protein residues                                          | 202.8 (18.8 – 600.0)                                                              |                                                     |                                                     |                                                                                     |                                             |                                                                                                |
| Ligands                                                   | 118.4 (62.8 – 202.0)                                                              |                                                     |                                                     |                                                                                     |                                             |                                                                                                |
| Model geometry (r.m.s.d.)                                 |                                                                                   |                                                     |                                                     |                                                                                     |                                             |                                                                                                |
| Bond lengths (Å)                                          | 0.0209                                                                            |                                                     |                                                     |                                                                                     |                                             |                                                                                                |
| Bond angles (°)                                           | 1.73                                                                              |                                                     |                                                     |                                                                                     |                                             |                                                                                                |
| Ramachandran plot                                         |                                                                                   |                                                     |                                                     |                                                                                     |                                             |                                                                                                |
| Favored (%)                                               | 98.71                                                                             |                                                     |                                                     |                                                                                     |                                             |                                                                                                |
| Allowed (%)                                               | 1.25                                                                              |                                                     |                                                     |                                                                                     |                                             |                                                                                                |
| Disallowed (%)                                            | 0.04                                                                              |                                                     |                                                     |                                                                                     |                                             |                                                                                                |
| Validation                                                |                                                                                   |                                                     |                                                     |                                                                                     |                                             |                                                                                                |
| MolProbity score                                          | 0.76                                                                              |                                                     |                                                     |                                                                                     |                                             |                                                                                                |
| Clash score                                               | 0.82                                                                              |                                                     |                                                     |                                                                                     |                                             |                                                                                                |
| Poor rotamers (%)                                         | 0.00                                                                              |                                                     |                                                     |                                                                                     |                                             |                                                                                                |

**Supplementary Table 3. Homologous residue numbering for residues involved in Interface I & II of Hsp90:Hsp70 in the GR-loading complex**

|                          | Hsp90 $\alpha$ | Hsp82 | Hsc82 | Hsp70 | Ssa1 |
|--------------------------|----------------|-------|-------|-------|------|
| Interface I<br>residues  | S53            | S39   | S39   | Q156  | Q154 |
|                          | D57            | D43   | D43   | D160  | D158 |
|                          | R60            | R46   | R46   | V163  | T161 |
|                          | Y61            | Y47   | Y47   | I164  | I162 |
|                          | L64            | L50   | L50   |       |      |
|                          | Y216           | Y203  | Y203  |       |      |
| Interface II<br>residues | E332           | E312  | E308  | R171  | R169 |
|                          | G333           | G313  | G309  | N174  | N172 |
|                          | Q334           | Q314  | Q310  | T177  | T175 |
|                          | E336           | E316  | E312  | D213  | E210 |
|                          | K414           | K394  | K390  | D214  | D211 |
|                          | K418           | K398  | K394  | I216  | I213 |
|                          | K419           | K399  | K395  | F217  | F214 |
